# Supplementary material
Source: publisher figshare collection journal article supplement (https://karger.figshare.com/articles/dataset/_/5120461)
Supplement: Supplementary file 1 [file 1]

**Table 2: Lists of differentially expressed genes between Blastemal component (BL) from Wilms tumor and fetal kidney (FK) (\* genes with concomitant expression in FKxMK)**

| BL x FK      |             |       |         |              |             |         |         |
|--------------|-------------|-------|---------|--------------|-------------|---------|---------|
| up BL        |             |       |         | up FK        |             |         |         |
| Sequence ACC | gene symbol | fold  | pvalue  | Sequence ACC | gene symbol | fold    | pvalue  |
| AW389895     | UBE2R2      | 2'003 | 0.001   | BE070870     | PTPRO       | -26'486 | 0.001   |
| BI044601     | NUP107      | 2'008 | 0.001   | AW797111     | FCGR2B      | -14'034 | 0.001   |
| AW997536     | DYNC1LI2    | 2'019 | 0.001   | BG957388     | LGALS4      | -11'647 | 0.001   |
| AF070622     | RAI17       | 2'020 | 0.001   | AW385724     | DPP4        | -11'584 | 0.001   |
| BF376173     |             | 2'033 | 0.001   | AW371798     | CRYL1       | -10'641 | 0.001   |
| BE938522     | DAP         | 2'063 | 0.001   | BE768572     | TMPRSS2     | -9'724  | 0.001   |
| AW606362     | CHST10      | 2'086 | 0.001   | BF094245     | SLC27A2     | -7'855  | 0.001   |
| BE826059     | NCOA6       | 2'087 | 0.001   | BE184281     | PDZK1IP1    | -7'797  | 0.001   |
| BE931846     | NELL2       | 2'090 | 0.010   | BF087631     | LRP2        | -7'756  | 0.001   |
| AW843837     | RBBP6       | 2'100 | 0.001   | BF375643     | TSPAN8      | -7'665  | 0.001   |
| BI032631     | PCM1        | 2'106 | 0.001   | BF807883     | VIL1        | -7'363  | 0.001   |
| AW900113     | TTYH3       | 2'137 | 0.001   | AW854750     | NOS3        | -6'703  | 0.001   |
| AW895945     | MAPT        | 2'140 | 0.001   | BC022426     | GJB1        | -6'300  | 0.001   |
| BF893580     | RIPK5       | 2'142 | 0.001   | AW381525     | IMPA2       | -6'235  | 0.001   |
| AW577482     | DHX9        | 2'150 | 0.001   | AW865864     | ANXA4       | -6'064  | 0.001   |
| BE178648     | PLAGL1      | 2'151 | 0.003   | AW854063     | ANXA13      | -6'059  | 0.001   |
| AW866514     | PTPN11      | 2'154 | 0.001   | BE172254     | KCNJ15      | -5'976  | 0.003   |
| AW379598     | PEG10       | 2'165 | 0.009   | BG000070     | C7          | -5'957  | 0.001   |
| AW361991     | GOSR1       | 2'197 | 0.007   | BE004304     | CYP1B1      | -5'873  | 0.001   |
| AW375114     | CHAF1A      | 2'200 | 0.001   | BQ330435     | CTSH        | -5'867  | 0.001   |
| BF889142     | CREBBP      | 2'220 | 0.001   | BF879245     | PTPN23      | -5'712  | 0.001   |
| BE818297     | RAD51C      | 2'227 | 0.001   | BF902394     | FGL2        | -5'623  | 0.001   |
| AK000445     | HOXC9       | 2'232 | 0.001 * | BF918570     | JPH3        | -5'580  | 0.001   |
| AB046777     | ARID2       | 2'257 | 0.001   | AW900685     | HOP         | -5'161  | 0.001   |
| AW900776     | POGK        | 2'260 | 0.001   | CV351278     | FBP1        | -5'159  | 0.003 * |
| AK022670     | C20orf6     | 2'261 | 0.001   | BF091446     | HMGCS2      | -5'134  | 0.001 * |
| BQ325459     | RAD23B      | 2'277 | 0.001   | AW801248     | ZNF83       | -5'090  | 0.001   |
| BF807945     | PHIP        | 2'282 | 0.001   | AW875596     | STAR        | -4'926  | 0.001   |
| NM_018212    | ENAH        | 2'283 | 0.001 * | BE005493     | SFRP1       | -4'798  | 0.001   |
| BC026329     | GJA1        | 2'296 | 0.009   | BF736000     | CRYZ        | -4'744  | 0.001   |
| BI000305     | NKRF        | 2'298 | 0.005 * | BG987916     | LAD1        | -4'740  | 0.001   |
| AW898232     | APC         | 2'302 | 0.001 * | BC015134     | THBS1       | -4'661  | 0.001   |
| BF852789     | EIF2AK2     | 2'324 | 0.002   | AF158378     | AMACR       | -4'646  | 0.001   |
| BI061273     | LAMA4       | 2'333 | 0.010   | BF832940     | INADL       | -4'584  | 0.001   |
| AW579879     | ZKSCAN1     | 2'333 | 0.001   | BF836212     | S100A9      | -4'525  | 0.001   |
| BG994037     | ALDH18A1    | 2'338 | 0.001   | BE703382     | GPRC5B      | -4'478  | 0.001   |
| AK056630     | ZKSCAN1     | 2'343 | 0.001   | BQ368170     | GPC3        | -4'458  | 0.001   |
| BF929566     | MAP4K4      | 2'344 | 0.001 * | BE840880     | PRG1        | -4'433  | 0.001   |
| BE830628     | KIAA0310    | 2'346 | 0.001   | BF998279     | GNG11       | -4'423  | 0.001   |
| AW606643     | PIK3R3      | 2'350 | 0.001   | AW579835     | GPR56       | -4'411  | 0.001   |
| BF767420     | GPR3        | 2'358 | 0.001 * | AW363009     | MUC13       | -4'393  | 0.001   |
| BF090134     | TCF4        | 2'362 | 0.002   | AW364266     | SRD5A2L     | -4'374  | 0.001   |
| BE693240     | TRIO        | 2'363 | 0.001   | BG994232     | CTSC        | -4'335  | 0.001   |
| AW363282     | EHHADH      | 2'376 | 0.001   | AL049974     |             | -4'272  | 0.001   |
| AW610118     | EXOC3       | 2'387 | 0.001   | BF961008     | C9orf58     | -4'107  | 0.001   |
| BF094194     | ECT2        | 2'389 | 0.001   | BE711936     | AKR1B10     | -4'081  | 0.001   |

|          |           |       |         |          |          |        |         |
|----------|-----------|-------|---------|----------|----------|--------|---------|
| AW795371 | TTK       | 2'399 | 0.001   | BG959649 | MDM4     | -4'066 | 0.001   |
| AW391612 | FAM46A    | 2'417 | 0.004   | BE818267 | MALAT1   | -4'005 | 0.001   |
| AF308294 | KIF15     | 2'425 | 0.003   | BE767038 | PLEKHC1  | -3'985 | 0.001   |
| BE714106 | STEAP4    | 2'425 | 0.009   | BG015887 | GDF15    | -3'958 | 0.001   |
| BF758468 | POLQ      | 2'433 | 0.001   | BC008588 | PLS3     | -3'948 | 0.001   |
| AW370556 | NAGK      | 2'443 | 0.001   | AW891768 | MOXD1    | -3'943 | 0.001   |
| BF929919 | ARHGAP22  | 2'445 | 0.008   | BE010132 | HMOX1    | -3'943 | 0.001   |
| BG996952 | EME1      | 2'471 | 0.005   | BE184222 | ST14     | -3'940 | 0.001   |
| BC000422 | ARIH2     | 2'496 | 0.001   | BE716219 | SQRDL    | -3'910 | 0.001   |
| BE708499 | DLC1      | 2'509 | 0.001   | BG003832 | CAPG     | -3'820 | 0.003   |
| AW367991 | SFT2D3    | 2'510 | 0.001   | AK074285 | FAM84B   | -3'815 | 0.003   |
| AW818769 | C21orf59  | 2'520 | 0.001 * | AW816301 | ATP5L    | -3'761 | 0.001   |
| BQ375433 | NOS3      | 2'546 | 0.001   | BF987589 | C1orf135 | -3'713 | 0.001   |
| AF301222 | NY-REN-41 | 2'549 | 0.001   | BF993159 | CAPZA2   | -3'698 | 0.001   |
| AW387862 | ASB9      | 2'551 | 0.001   | AW582622 | PPL      | -3'657 | 0.001   |
| BI046408 | JARID2    | 2'555 | 0.001   | BF376147 | COMT     | -3'627 | 0.001   |
| BQ300376 | MCM2      | 2'560 | 0.010 * | BF888598 | CHMP5    | -3'593 | 0.001   |
| BE711992 | ADCY2     | 2'568 | 0.004   | BF800006 | S100P    | -3'587 | 0.001   |
| BF839730 | PTPLAD1   | 2'573 | 0.001   | BQ330774 | SEC11L3  | -3'569 | 0.001   |
| BE814748 | RAB2      | 2'582 | 0.001   | BG004736 | HSD11B2  | -3'566 | 0.003 * |
| AF071593 |           | 2'598 | 0.004   | AF207664 | ADAMTS1  | -3'526 | 0.001   |
| AW361544 | ROCK2     | 2'617 | 0.002 * | BG009056 | DLK1     | -3'514 | 0.002   |
| BE156108 | LETMD1    | 2'628 | 0.003   | AW364885 | CLDN2    | -3'481 | 0.001   |
| BE835884 | NAG       | 2'664 | 0.003   | BF892305 | TSPO     | -3'463 | 0.001   |
| AW384835 | CRABP2    | 2'673 | 0.003   | AW377644 | CAT      | -3'393 | 0.001   |
| BE006198 | PRC1      | 2'676 | 0.003 * | BE003667 | FLJ20273 | -3'387 | 0.001   |
| BE818371 | CHD7      | 2'694 | 0.001 * | BF944874 | DHRS3    | -3'385 | 0.006   |
| BE171753 | ATPIF1    | 2'714 | 0.001   | AW835215 | PLCG2    | -3'366 | 0.001 * |
| AW992050 | RFX5      | 2'718 | 0.001   | BC004907 | EPS8L1   | -3'351 | 0.003 * |
| AK027309 | QKI       | 2'756 | 0.001   | BE716905 | EGFR     | -3'343 | 0.001   |
| BF744447 | ELF2      | 2'757 | 0.001   | BF881754 | HECTD3   | -3'282 | 0.001   |
| BF819180 | ALDH1A3   | 2'775 | 0.001   | AW854184 | RNF141   | -3'276 | 0.001   |
| BF943213 | TMEM118   | 2'781 | 0.001   | BF930844 | BAZ2B    | -3'250 | 0.001   |
| AW937296 | CDCA2     | 2'787 | 0.001   | AW385157 | PFDN5    | -3'250 | 0.001   |
| AW805726 | SUV420H1  | 2'811 | 0.001   | BF903122 | S100A12  | -3'245 | 0.001   |
| BG958887 | CDCA8     | 2'823 | 0.003   | BE826174 | ALCAM    | -3'218 | 0.004   |
| BF087424 | PBXIP1    | 2'895 | 0.001   | BE843446 | STK3     | -3'211 | 0.001   |
| BE144847 | PSME4     | 2'927 | 0.003   | BF828943 | NMRAL1   | -3'205 | 0.004   |
| AW384023 | FRZB      | 2'948 | 0.002   | BQ345628 | TSC22D3  | -3'191 | 0.001   |
| BE003539 | SOX9      | 2'954 | 0.001   | AW370761 | SLC22A18 | -3'189 | 0.004   |
| AW863578 | VLDLR     | 2'968 | 0.002   | BE774740 | PLTP     | -3'185 | 0.001   |
| BF911621 | AUTS2     | 3'080 | 0.001   | BF894088 | MTPN     | -3'165 | 0.001   |
| BE694581 | PIAS3     | 3'090 | 0.001   | BF831184 | DNAJA4   | -3'119 | 0.001   |
| BQ325477 | ENC1      | 3'122 | 0.002   | BF354583 | LCN2     | -3'118 | 0.001   |
| AW370132 | CDK2AP1   | 3'188 | 0.001   | AW935141 | RBM35B   | -3'105 | 0.001   |
| BQ321651 | NEO1      | 3'291 | 0.001   | BQ304779 | PLOD2    | -3'087 | 0.001   |
| BI044030 | TPX2      | 3'308 | 0.001 * | BG986387 | TMEM9    | -3'079 | 0.005   |
| BE075857 | RPL27     | 3'349 | 0.001   | AW837156 | HSPH1    | -3'067 | 0.001   |
| BF960609 | PEX12     | 3'402 | 0.001   | BF092878 | ITM2B    | -3'051 | 0.001   |
| BE767619 | IFI44L    | 3'437 | 0.001   | BF363417 | ASAH1    | -3'036 | 0.003   |
| AW384593 | TIMELESS  | 3'438 | 0.001   | AW937798 | PAPSS2   | -3'029 | 0.001   |
| BE167954 | RPS2      | 3'445 | 0.002   | BG997034 | SPINT2   | -2'994 | 0.001   |

|          |         |        |       |           |          |        |         |
|----------|---------|--------|-------|-----------|----------|--------|---------|
| BQ368557 | MAST4   | 3'611  | 0.001 | AW391502  | NOX4     | -2'990 | 0.001   |
| BF373775 | RGS5    | 3'616  | 0.001 | BF747873  | PRPF40B  | -2'988 | 0.001   |
| L23116   | GALC    | 4'069  | 0.001 | S52873    | CDA      | -2'936 | 0.001 * |
| BG998789 | FOXP1   | 4'658  | 0.001 | NM_003816 | ADAM9    | -2'899 | 0.001   |
| BF829350 | RGS16   | 4'699  | 0.002 | AW884081  | CBR1     | -2'885 | 0.001   |
| AW382924 | THBS4   | 4'723  | 0.001 | BI005735  | HSPA12A  | -2'884 | 0.001   |
| AW367997 | EXTL2   | 5'201  | 0.001 | BQ318642  | PTPN3    | -2'881 | 0.001   |
| BG990573 | MGAT1   | 5'204  | 0.001 | BQ375071  | PGCP     | -2'871 | 0.005   |
| BG989444 | SMYD1   | 5'580  | 0.001 | BE709006  | IGFBP4   | -2'855 | 0.010   |
| BI017810 | BCL3    | 6'149  | 0.006 | BE817826  | TM9SF2   | -2'852 | 0.001   |
| CK326978 | SLC26A1 | 12'805 | 0.001 | BQ352820  | SLC30A9  | -2'841 | 0.001   |
| AW793024 | MAGEH1  | 15'061 | 0.001 | BI021150  | DEFA4    | -2'837 | 0.001   |
|          |         |        |       | BF854014  | HPGD     | -2'836 | 0.001   |
|          |         |        |       | AK000122  | MGC35048 | -2'832 | 0.002   |
|          |         |        |       | BF819171  | ARMC6    | -2'830 | 0.001   |
|          |         |        |       | BE714658  | MGST3    | -2'829 | 0.001   |
|          |         |        |       | BE004752  | RARRES1  | -2'811 | 0.001   |
|          |         |        |       | BE841332  | RNASE1   | -2'791 | 0.002   |
|          |         |        |       | BF856421  | C1orf172 | -2'771 | 0.001   |
|          |         |        |       | BF851114  | LPL      | -2'767 | 0.001 * |
|          |         |        |       | AW899432  | RG9MTD3  | -2'764 | 0.002   |
|          |         |        |       | AW361928  | SLC37A1  | -2'760 | 0.002   |
|          |         |        |       | BF748528  | FES      | -2'757 | 0.001   |
|          |         |        |       | BF086797  | ADFP     | -2'730 | 0.001   |
|          |         |        |       | BF815300  | IVNS1ABP | -2'730 | 0.001   |
|          |         |        |       | M11315    | COL4A1   | -2'705 | 0.002   |
|          |         |        |       | BF769073  | RPS16    | -2'703 | 0.001   |
|          |         |        |       | BC007649  | AGRN     | -2'667 | 0.001   |
|          |         |        |       | NM_144686 | TMC4     | -2'660 | 0.005   |
|          |         |        |       | BF951903  | CCBL1    | -2'654 | 0.001   |
|          |         |        |       | BF985269  | NEDD9    | -2'639 | 0.006   |
|          |         |        |       | AW900072  | KIAA0103 | -2'629 | 0.001   |
|          |         |        |       | BF929559  | FLJ22662 | -2'623 | 0.001   |
|          |         |        |       | BC033039  | LGR4     | -2'619 | 0.001   |
|          |         |        |       | AB028019  | LATS2    | -2'613 | 0.001   |
|          |         |        |       | AW368601  | NOLA3    | -2'606 | 0.001   |
|          |         |        |       | BF945746  | PALM     | -2'604 | 0.003   |
|          |         |        |       | BC027877  | TEAD3    | -2'600 | 0.001   |
|          |         |        |       | BE702066  | SCHIP1   | -2'587 | 0.001   |
|          |         |        |       | BF735384  | P4HA1    | -2'586 | 0.001   |
|          |         |        |       | BG009559  | GRB7     | -2'569 | 0.001   |
|          |         |        |       | BI013465  | PRR8     | -2'542 | 0.001   |
|          |         |        |       | BE926073  | SPON1    | -2'529 | 0.006   |
|          |         |        |       | BQ350306  | PRDX3    | -2'529 | 0.001   |
|          |         |        |       | BE066048  | PIK3C3   | -2'527 | 0.001   |
|          |         |        |       | BF806843  | FAM65A   | -2'524 | 0.001   |
|          |         |        |       | BE932430  | FOSL2    | -2'515 | 0.003   |
|          |         |        |       | BF766837  | TST      | -2'511 | 0.001   |
|          |         |        |       | BG952316  | HGD      | -2'508 | 0.001   |
|          |         |        |       | BQ372768  | PEPD     | -2'502 | 0.001   |
|          |         |        |       | BF846692  | F11R     | -2'490 | 0.002   |
|          |         |        |       | BF767127  | C6orf170 | -2'487 | 0.004   |

|           |            |        |         |
|-----------|------------|--------|---------|
| BE763887  | CPE        | -2'478 | 0.004   |
| BF844001  | LRP10      | -2'477 | 0.001   |
| BE939351  | COQ9       | -2'471 | 0.001   |
| BF761138  | DCXR       | -2'466 | 0.006   |
| BF826997  | GATM       | -2'459 | 0.001   |
| AW796618  | OSR2       | -2'455 | 0.001 * |
| BE082138  | YLPM1      | -2'447 | 0.001   |
| AW804706  | ACSL5      | -2'439 | 0.005   |
| AW902185  | TPD52      | -2'438 | 0.001   |
| BI047245  | OLFM1      | -2'438 | 0.002   |
| BF816347  | ATP5J2     | -2'434 | 0.001   |
| BE089360  | DIAPH2     | -2'420 | 0.001   |
| AW902143  | EPB41L5    | -2'418 | 0.001   |
| AW866947  | CDC14A     | -2'417 | 0.001   |
| BF362265  | BLCAP      | -2'416 | 0.001   |
| BE171117  | IFNAR2     | -2'415 | 0.003   |
| BC033071  | GRTP1      | -2'415 | 0.001   |
| AW748265  | CYB5R4     | -2'402 | 0.001   |
| BE767441  | PTGS1      | -2'394 | 0.001 * |
| BE816902  | C3orf28    | -2'391 | 0.001   |
| BF761019  | PROS1      | -2'370 | 0.001   |
| BF879583  | NAPA       | -2'366 | 0.001   |
| BI031027  | TXNIP      | -2'360 | 0.001   |
| BC008357  | D15Wsu75e  | -2'360 | 0.001   |
| BF881199  | TRADD      | -2'359 | 0.008 * |
| BF735828  | PDZRN3     | -2'349 | 0.010   |
| CV361093  | DARS       | -2'342 | 0.001   |
| BE172635  | CLDN8      | -2'342 | 0.001   |
| BF155978  | IL1R2      | -2'338 | 0.003   |
| BE819436  | SKP1A      | -2'324 | 0.001   |
| AW892707  | BET1       | -2'321 | 0.003   |
| BE813180  | SLBP       | -2'320 | 0.001   |
| AW361013  | ST6GALNAC2 | -2'317 | 0.001   |
| NM_006112 | PPIE       | -2'316 | 0.001   |
| NM_012417 | PITPNC1    | -2'316 | 0.001   |
| AW361909  | RPL18      | -2'298 | 0.002   |
| BF905693  | IL1RL1     | -2'279 | 0.001   |
| BE711900  | NQO2       | -2'275 | 0.001   |
| BE930290  | GDAP2      | -2'275 | 0.001   |
| BG982805  | TMEM147    | -2'270 | 0.001   |
| M63573    | PPIB       | -2'264 | 0.009   |
| BE927669  | STARD3NL   | -2'255 | 0.001   |
| BE836871  | PRKAB1     | -2'249 | 0.001   |
| AW379161  | RNF19      | -2'247 | 0.001   |
| BE165719  | PPARGC1A   | -2'247 | 0.001   |
| NM_000851 | GSTM5      | -2'236 | 0.002   |
| BF371928  | TMEFF2     | -2'233 | 0.002   |
| AW938172  | STX3       | -2'219 | 0.001   |
| BF761761  | TACSTD1    | -2'219 | 0.006   |
| BE174343  | PLVAP      | -2'218 | 0.003   |
| BE833363  | LITAF      | -2'205 | 0.001   |
| BQ353573  | CYLD       | -2'201 | 0.001   |

|           |           |        |         |
|-----------|-----------|--------|---------|
| AW393101  | ACSL4     | -2'186 | 0.001   |
| AW946376  | PGRMC1    | -2'183 | 0.001   |
| BF846568  | C2orf28   | -2'177 | 0.001   |
| AK026295  |           | -2'174 | 0.001   |
| BQ335922  | NCKAP1L   | -2'168 | 0.001   |
| BF954314  | MRPS35    | -2'166 | 0.001   |
| BQ314808  | ELN       | -2'166 | 0.001   |
| BF803813  | PTPRG     | -2'154 | 0.001   |
| AW842249  | ZNF266    | -2'153 | 0.001   |
| BF771624  | SIP1      | -2'151 | 0.001   |
| BQ319440  | RGS12     | -2'141 | 0.001   |
| BQ300495  | CHD8      | -2'137 | 0.002   |
| AW796146  | HMGCL     | -2'136 | 0.005   |
| BI039015  | CUEDC2    | -2'135 | 0.002   |
| BC002352  | DNAJB1    | -2'133 | 0.001   |
| BE841696  | COTL1     | -2'131 | 0.001   |
| AW838364  | HADHB     | -2'126 | 0.001   |
| AW888741  | PAWR      | -2'125 | 0.001   |
| BF375650  | CPVL      | -2'123 | 0.001 * |
| AW798550  | FUCA1     | -2'114 | 0.001   |
| AW394127  | PLAT      | -2'114 | 0.001   |
| BF930541  | CHPT1     | -2'104 | 0.001   |
| AW580769  | FAM107B   | -2'103 | 0.001   |
| BI019208  | SCNN1A    | -2'101 | 0.001   |
| BQ302953  | C2orf25   | -2'094 | 0.001   |
| BI028823  | GENX-3414 | -2'085 | 0.001   |
| BF084768  | MRE11A    | -2'080 | 0.001 * |
| BF090168  | KBTBD11   | -2'077 | 0.002   |
| BE829257  | ADPRHL2   | -2'069 | 0.003   |
| BG945225  | UXT       | -2'069 | 0.001   |
| BF954150  | GYG1      | -2'063 | 0.001   |
| BC032528  | LTA4H     | -2'062 | 0.001   |
| BF085141  | GBAS      | -2'056 | 0.001   |
| BI006287  | KLHDC2    | -2'055 | 0.001   |
| AW382377  | PHF11     | -2'051 | 0.004   |
| BE081583  | ARF3      | -2'050 | 0.002   |
| BF814144  | C1orf103  | -2'048 | 0.001   |
| U17743    | MAP2K4    | -2'048 | 0.001   |
| BF989454  | C15orf15  | -2'045 | 0.001   |
| BF733585  | CTNNAL1   | -2'043 | 0.001   |
| BF995787  | SLC44A2   | -2'041 | 0.010   |
| BF833125  | DUSP1     | -2'038 | 0.009   |
| BI042379  | WDR13     | -2'036 | 0.001   |
| BI005334  | ATAD4     | -2'036 | 0.001   |
| BQ300473  | CD207     | -2'035 | 0.001   |
| BG961592  | ARHGEF10L | -2'023 | 0.002   |
| BE939551  | GHITM     | -2'023 | 0.002   |
| BF994020  | PGD       | -2'023 | 0.001   |
| NM_004668 | MGAM      | -2'020 | 0.001   |
| AW805136  | SUMF1     | -2'018 | 0.001   |
| BF946019  | JPH4      | -2'014 | 0.001 * |
| AW369854  | WWP2      | -2'005 | 0.001   |

|          |        |        |       |
|----------|--------|--------|-------|
| BE774514 | SNX14  | -2'002 | 0.001 |
| BF851636 | TMEM98 | -1'999 | 0.004 |
| BF083478 | BTG3   | -1'998 | 0.001 |
