# Supplementary material
Source: publisher figshare collection journal article supplement (https://karger.figshare.com/articles/dataset/_/5120461)
Supplement: Supplementary file 2 [file 1]

**Table 3: Lists of differentially expressed genes between fetal (FK) and mature (MK) normal kidney**

| FK x MK      |             |       |        |              |             |         |        |
|--------------|-------------|-------|--------|--------------|-------------|---------|--------|
| up FK        |             |       |        | up MK        |             |         |        |
| Sequence ACC | gene symbol | fold  | pvalue | Sequence ACC | gene symbol | fold    | pvalue |
| BI037226     | POLS        | 2'010 | 0.003  | AW371122     | FKSG24      | -26'110 | 0.003  |
| AW604838     | CDS1        | 2'010 | 0.012  | BI017810     | BCL3        | -10'902 | 0.004  |
| AW890018     | PSMA5       | 2'017 | 0.001  | L38707       | DGKQ        | -8'593  | 0.003  |
| AB062287     | HNRPF       | 2'018 | 0.005  | L23116       | GALC        | -8'437  | 0.003  |
| BE929401     | NFAT5       | 2'019 | 0.003  | BE075857     | ZNF19       | -7'910  | 0.003  |
| BE710880     | TPBG        | 2'023 | 0.001  | AW863578     | VLDLR       | -6'443  | 0.003  |
| NM_006112    | PPIE        | 2'024 | 0.003  | AW793024     | MAGEH1      | -6'127  | 0.018  |
| AW371197     | PAK1        | 2'026 | 0.003  | BE170776     | GLCE        | -6'112  | 0.003  |
| AK025956     | COPZ1       | 2'033 | 0.001  | BE003539     | SOX9        | -6'055  | 0.001  |
| BE814130     | ERBP        | 2'033 | 0.003  | BF087424     | PBXIP1      | -5'891  | 0.001  |
| BI017825     | SYK         | 2'039 | 0.013  | AJ002309     | SYNGR3      | -5'700  | 0.003  |
| AW900721     | SNAPC3      | 2'050 | 0.003  | AW582172     | NR4A2       | -5'620  | 0.003  |
| BC021106     | MRPS16      | 2'058 | 0.012  | AW604042     | FXYD3       | -5'144  | 0.003  |
| BF767127     | C6orf170    | 2'062 | 0.003  | AW393825     | MRPS28      | -4'802  | 0.001  |
| BI013186     | NOLC1       | 2'081 | 0.021  | BG004736     | HSD11B2     | -4'772  | 0.003  |
| AW750281     | TARS        | 2'083 | 0.005  | AK000297     | LUZP1       | -4'589  | 0.003  |
| BI029622     | MANBAL      | 2'092 | 0.003  | AL080118     | C14orf109   | -4'575  | 0.001  |
| BQ316578     | CCT7        | 2'093 | 0.003  | BF820483     | ANKH        | -4'010  | 0.003  |
| BQ334593     | B4GALT5     | 2'093 | 0.008  | BE184402     | SLPI        | -3'871  | 0.003  |
| AW809205     | WAC         | 2'094 | 0.004  | BQ339434     | MASS1       | -3'826  | 0.003  |
| BQ319440     | RGS12       | 2'096 | 0.003  | AW175991     | USP13       | -3'785  | 0.003  |
| BC015895     | SNAI2       | 2'108 | 0.019  | BI002054     | SORT1       | -3'779  | 0.003  |
| BF943501     | COP55       | 2'109 | 0.003  | AW862277     | WDR48       | -3'751  | 0.003  |
| BF093873     | LOC133619   | 2'110 | 0.003  | AW370132     | CDK2AP1     | -3'643  | 0.003  |
| BE702066     | SCHIP1      | 2'115 | 0.003  | BF373775     | RGS5        | -3'642  | 0.003  |
| BI042336     | NUP205      | 2'118 | 0.003  | BE839717     | CYP24A1     | -3'628  | 0.007  |
| BF771624     | SIP1        | 2'132 | 0.003  | AF222742     | GPSN2       | -3'626  | 0.009  |
| AW391543     | TOP2A       | 2'133 | 0.002  | BF802467     | C9orf74     | -3'502  | 0.001  |
| BE817051     | RBMS3       | 2'137 | 0.003  | BG989444     | SMYD1       | -3'494  | 0.001  |
| BG984349     | C6orf85     | 2'144 | 0.003  | BE825506     | HNMT        | -3'429  | 0.003  |
| AL049703     | PDCD8       | 2'147 | 0.003  | U59913       | SMAD5       | -3'395  | 0.017  |
| AL133564     | NA          | 2'150 | 0.002  | BE714106     | STEAP4      | -3'352  | 0.004  |
| BQ300376     | MCM2        | 2'165 | 0.003  | BC006243     | RGS16       | -3'336  | 0.003  |
| BF874649     | FLJ10081    | 2'166 | 0.003  | BF084768     | MRE11A      | -3'286  | 0.003  |
| BI048917     | KCMF1       | 2'169 | 0.004  | BG979976     | CNN1        | -3'275  | 0.003  |
| NM_004668    | MGAM        | 2'171 | 0.003  | AW391612     | FAM46A      | -3'260  | 0.003  |
| BE065335     | LR8         | 2'171 | 0.004  | AW581245     | ABI3        | -3'241  | 0.005  |

|          |             |       |       |          |           |        |       |
|----------|-------------|-------|-------|----------|-----------|--------|-------|
| BF986322 | PALM2-AKAF  | 2'173 | 0.001 | BE767619 | IFI44L    | -3'232 | 0.001 |
| BE818371 | CHD7        | 2'175 | 0.002 | AW799250 | KCTD2     | -3'226 | 0.003 |
| BE930452 | PARVA       | 2'177 | 0.003 | BF229555 | ST3GAL4   | -3'197 | 0.003 |
| AF039945 | SYNJ2       | 2'180 | 0.003 | BF874151 | MRPS17    | -3'192 | 0.001 |
| BF769073 | RPS16       | 2'187 | 0.003 | AW885738 | SGK       | -3'185 | 0.004 |
| BF798133 | JMJD1C      | 2'188 | 0.004 | BF798801 | PDIK1L    | -3'133 | 0.002 |
| BE844201 | TCF12       | 2'188 | 0.003 | AL049369 | DSCR1     | -3'082 | 0.002 |
| BF920339 | SEC11L1     | 2'201 | 0.001 | BF822399 | NTN4      | -3'073 | 0.003 |
| AW367017 | ambiguous   | 2'212 | 0.003 | BF763635 | GRIN2B    | -3'051 | 0.003 |
| BE004304 | CYP1B1      | 2'212 | 0.006 | BI010260 | STC1      | -3'047 | 0.022 |
| BE832979 | NHN1        | 2'215 | 0.003 | BF829474 | SLC25A29  | -3'027 | 0.003 |
| AW904800 | KIAA0644    | 2'234 | 0.003 | BI014388 | EFHD1     | -3'015 | 0.001 |
| BE769509 | COPS6       | 2'236 | 0.003 | AW365779 | CES1      | -3'009 | 0.003 |
| AF151813 | SERBP1      | 2'241 | 0.003 | BE775292 | CYFIP2    | -2'989 | 0.001 |
| BE810796 | UBE3B       | 2'242 | 0.001 | BE840322 | SYNPO2    | -2'976 | 0.001 |
| BE827689 | CSNK1D      | 2'246 | 0.008 | BF811848 | SEH1L     | -2'940 | 0.003 |
| BI007468 | LDB2        | 2'254 | 0.007 | AL512749 | SLC7A2    | -2'930 | 0.001 |
| BI013465 | PRR8        | 2'265 | 0.003 | AW895945 | ambiguous | -2'902 | 0.003 |
| BE833238 | NANS        | 2'287 | 0.003 | BC009678 | RARRES3   | -2'890 | 0.003 |
| AW361544 | ROCK2       | 2'293 | 0.003 | BF087461 | PLAU      | -2'880 | 0.010 |
| BF897076 | CD59        | 2'304 | 0.022 | M88461   | NPY1R     | -2'871 | 0.005 |
| BI003883 | CFLAR       | 2'306 | 0.003 | BQ328194 | HLA-F     | -2'855 | 0.002 |
| BF800006 | S100P       | 2'308 | 0.005 | AW935157 | TP53INP2  | -2'855 | 0.011 |
| BE933907 | SPCS3       | 2'309 | 0.006 | BC011353 | LPL       | -2'848 | 0.009 |
| BG951026 | C15orf20    | 2'315 | 0.013 | AW854057 | GPR35     | -2'845 | 0.003 |
| BE934848 | RHOBTB1     | 2'328 | 0.003 | BI011956 | ITPK1     | -2'782 | 0.003 |
| BC002352 | DNAJB1      | 2'339 | 0.003 | BF881199 | TRADD     | -2'780 | 0.003 |
| BF831184 | DNAJA4      | 2'345 | 0.001 | BE702360 | CELSR2    | -2'751 | 0.003 |
| AW992255 | ambiguous   | 2'358 | 0.003 | BF957791 | ambiguous | -2'745 | 0.003 |
| AK000445 | HOXC9       | 2'359 | 0.003 | BC005157 | TCTA      | -2'735 | 0.003 |
| BF813119 | AKAP8L      | 2'362 | 0.021 | AL110264 | DENND3    | -2'707 | 0.003 |
| BE767943 | ZFP36L1     | 2'363 | 0.003 | BG994639 | HSA272196 | -2'704 | 0.001 |
| BF921689 | EML4        | 2'363 | 0.003 | BF819994 | PARD6A    | -2'699 | 0.003 |
| AW379482 | UBE2B       | 2'366 | 0.003 | BE843445 | TMED2     | -2'695 | 0.003 |
| BF888717 | MSH6        | 2'377 | 0.003 | BE715200 | APRT      | -2'690 | 0.023 |
| AW367999 | RNF13       | 2'386 | 0.003 | BF091446 | HMGCS2    | -2'677 | 0.001 |
| AW377048 | ARPC2       | 2'389 | 0.004 | BQ338608 | CYFIP2    | -2'651 | 0.001 |
| BG979000 | C20orf14    | 2'398 | 0.002 | BE159811 | MRPL47    | -2'651 | 0.003 |
| BI000305 | NKRF        | 2'403 | 0.003 | AK000222 | METTL3    | -2'627 | 0.003 |
| AW818769 | C21orf59    | 2'423 | 0.001 | BF375650 | CPVL      | -2'622 | 0.003 |
| BF735072 | AASDHPPT    | 2'427 | 0.002 | AW392633 | EYA2      | -2'618 | 0.003 |
| BF851636 | DKFZP564K19 | 2'430 | 0.003 | BE926721 | ANKRD2    | -2'612 | 0.020 |

|           |          |       |       |           |           |        |       |
|-----------|----------|-------|-------|-----------|-----------|--------|-------|
| AK056075  | NA       | 2'435 | 0.001 | AW799307  | GLDC      | -2'596 | 0.003 |
| AF012126  | ZNF198   | 2'436 | 0.003 | BE843326  | SOX17     | -2'588 | 0.003 |
| BF813609  | ATP9A    | 2'437 | 0.003 | Y09943    | BTG2      | -2'584 | 0.003 |
| BE767038  | PLEKHC1  | 2'439 | 0.003 | AW866073  | DSCR1L1   | -2'580 | 0.004 |
| BF819565  | SFPQ     | 2'442 | 0.002 | BF846708  | PDXK      | -2'575 | 0.003 |
| BG001122  | PTPN12   | 2'444 | 0.001 | BF846123  | ADC       | -2'571 | 0.004 |
| AW385157  | PFDN5    | 2'444 | 0.017 | BF996555  | IL6ST     | -2'569 | 0.003 |
| BQ316492  | MET      | 2'449 | 0.007 | S52873    | CDA       | -2'555 | 0.002 |
| AW861509  | UBAP2    | 2'449 | 0.003 | BI047257  | CKMT2     | -2'554 | 0.003 |
| AW898232  | APC      | 2'461 | 0.009 | U47918    | FBP1      | -2'544 | 0.003 |
| BE694411  | LOC51035 | 2'464 | 0.003 | BG945862  | PFDN2     | -2'543 | 0.001 |
| AW362944  | KIAA1280 | 2'466 | 0.016 | BE715826  | HS3ST1    | -2'541 | 0.003 |
| AW368077  | SDCCAG10 | 2'477 | 0.001 | BC004907  | EPS8L1    | -2'518 | 0.001 |
| BE763842  | TLOC1    | 2'485 | 0.001 | AW386757  | SYP       | -2'485 | 0.020 |
| BF961718  | MARK1    | 2'488 | 0.013 | BC001663  | ambiguous | -2'468 | 0.007 |
| AW608814  | MUTED    | 2'490 | 0.003 | AW820109  | ATP5H     | -2'437 | 0.003 |
| BQ340277  | ABI2     | 2'497 | 0.003 | BF957370  | ZYG11B    | -2'435 | 0.015 |
| AW385628  | GUCY1A3  | 2'498 | 0.001 | BE695705  | SAT       | -2'416 | 0.008 |
| AW361909  | RPL18    | 2'524 | 0.008 | BE928759  | PHYH      | -2'412 | 0.003 |
| BI006287  | KLHDC2   | 2'528 | 0.003 | BE938522  | DAP       | -2'400 | 0.002 |
| BF808559  | PRO2730  | 2'536 | 0.003 | BE935001  | CPSF6     | -2'397 | 0.003 |
| BE763856  | SAS10    | 2'560 | 0.001 | NM_002714 | PPP1R10   | -2'391 | 0.003 |
| BF336739  | PUM1     | 2'563 | 0.003 | AB037859  | MKL1      | -2'389 | 0.010 |
| AB033064  | FAM80B   | 2'567 | 0.003 | BF742976  | MLLT6     | -2'384 | 0.004 |
| BC005145  | GDI2     | 2'571 | 0.003 | BF082447  | KEL       | -2'378 | 0.005 |
| AL110225  | DBN1     | 2'575 | 0.003 | BE928957  | C14orf130 | -2'372 | 0.012 |
| BE769144  | MKRN1    | 2'589 | 0.003 | AW997085  | CD44      | -2'369 | 0.012 |
| BF349486  | MRFAP1   | 2'593 | 0.003 | BE811192  | MRPL27    | -2'333 | 0.003 |
| AW994907  | RPL15    | 2'596 | 0.001 | AB011004  | UAP1      | -2'327 | 0.002 |
| NM_012417 | PITPNC1  | 2'601 | 0.003 | BF819760  | RHBG      | -2'322 | 0.010 |
| BI021150  | DEFA4    | 2'610 | 0.003 | AJ420562  | PKIB      | -2'321 | 0.003 |
| AW606846  | RNUXA    | 2'620 | 0.002 | AK023512  | SPAG9     | -2'307 | 0.003 |
| AW993456  | RPL22    | 2'630 | 0.003 | BI019208  | SCNN1A    | -2'301 | 0.013 |
| BC014131  | RPUSD4   | 2'630 | 0.003 | BF804839  | SPATA20   | -2'282 | 0.003 |
| BF767420  | GPR3     | 2'638 | 0.003 | AW821152  | MAN1C1    | -2'282 | 0.001 |
| BF920151  | AASS     | 2'642 | 0.003 | AW748743  | SRPX      | -2'278 | 0.013 |
| BE006198  | PRC1     | 2'658 | 0.001 | BE000876  | KIAA1815  | -2'271 | 0.015 |
| BF798551  | KIAA1211 | 2'661 | 0.001 | BG993300  | ADH1B     | -2'270 | 0.002 |
| AW364266  | SRD5A2L  | 2'661 | 0.003 | AW796413  | C9orf72   | -2'258 | 0.001 |
| BE926073  | SPON1    | 2'667 | 0.015 | BQ339531  | AK1       | -2'255 | 0.003 |
| AW364885  | CLDN2    | 2'672 | 0.015 | AW891548  | PFKP      | -2'245 | 0.003 |
| BE074346  | EIF3S3   | 2'690 | 0.003 | BE152165  | RAB8A     | -2'244 | 0.002 |

|           |           |       |       |           |           |        |       |
|-----------|-----------|-------|-------|-----------|-----------|--------|-------|
| BF871672  | BOC       | 2'706 | 0.003 | BG951090  | FLJ21511  | -2'231 | 0.003 |
| BE938548  | FKBP10    | 2'723 | 0.003 | AF093262  | HOMER1    | -2'230 | 0.017 |
| BE926531  | CMYA5     | 2'738 | 0.003 | BF991066  | GAS2L1    | -2'211 | 0.001 |
| BE768344  | ENTH      | 2'762 | 0.003 | AW363105  | PRKAG2    | -2'210 | 0.002 |
| BI044792  | CBLB      | 2'799 | 0.003 | BF828421  | FRAS1     | -2'199 | 0.003 |
| BI046232  | LEREPO4   | 2'801 | 0.003 | BQ292861  | HIGD1B    | -2'193 | 0.001 |
| BF952507  | RAP2A     | 2'806 | 0.003 | BG999611  | SLC4A5    | -2'192 | 0.015 |
| BF902394  | FGL2      | 2'827 | 0.003 | BG998789  | FOXP1     | -2'190 | 0.003 |
| BF815299  | CSDE1     | 2'833 | 0.001 | BF959926  | TA-PP2C   | -2'181 | 0.014 |
| AF038404  | SEPT2     | 2'866 | 0.003 | AW867112  | ASH1L     | -2'180 | 0.004 |
| BI059343  | TIMM17A   | 2'882 | 0.001 | BF229686  | C1orf56   | -2'174 | 0.001 |
| BI059123  | ACLY      | 2'887 | 0.002 | BE168307  | CKLFSF4   | -2'150 | 0.021 |
| AW821029  | PLXND1    | 2'891 | 0.007 | BF960230  | COX7B     | -2'144 | 0.001 |
| AK054972  | MTHFS     | 2'899 | 0.003 | NM_006570 | RRAGA     | -2'142 | 0.003 |
| AW865864  | ANXA4     | 2'899 | 0.003 | AW364947  | SCOTIN    | -2'133 | 0.003 |
| AW839114  | MERTK     | 2'909 | 0.003 | BF955180  | FLJ20366  | -2'133 | 0.003 |
| AW385642  | RIPK2     | 2'919 | 0.003 | AW878310  | HNRPH3    | -2'130 | 0.015 |
| BG994188  | FLJ21908  | 2'931 | 0.001 | BF819823  | KLHL21    | -2'126 | 0.003 |
| BF880478  | DAB2IP    | 2'934 | 0.003 | BF229725  | MMP1      | -2'124 | 0.003 |
| BF358017  | PGEA1     | 2'937 | 0.003 | M75952    | TLX1      | -2'121 | 0.007 |
| BE826004  | FLJ13213  | 2'945 | 0.003 | BF881941  | GREM1     | -2'120 | 0.009 |
| AF276893  | PAK6      | 2'950 | 0.003 | BF876289  | KBTBD2    | -2'112 | 0.003 |
| BF921490  | SALL2     | 2'960 | 0.003 | BQ321651  | LOC388134 | -2'102 | 0.003 |
| AW891768  | MOXD1     | 2'965 | 0.001 | AF052117  | CLCN4     | -2'096 | 0.004 |
| AW383995  | RBM9      | 2'970 | 0.003 | BF892305  | BZRP      | -2'091 | 0.015 |
| BF807986  | PPHLN1    | 2'978 | 0.001 | BQ310028  | C6orf136  | -2'089 | 0.003 |
| AW607658  | UACA      | 2'981 | 0.003 | BG002017  | CSF2RB    | -2'079 | 0.018 |
| M96859    | DPP6      | 3'046 | 0.003 | AW393741  | PHLDA3    | -2'076 | 0.021 |
| NM_017792 | NA        | 3'046 | 0.003 | BF377810  | CLIC1     | -2'057 | 0.003 |
| BE005493  | SFRP1     | 3'048 | 0.003 | AW577006  | MXD4      | -2'042 | 0.014 |
| BF737415  | GLG1      | 3'085 | 0.001 | AW835215  | PLCG2     | -2'040 | 0.003 |
| BF094245  | SLC27A2   | 3'105 | 0.003 | BF946019  | JPH4      | -2'036 | 0.003 |
| AW884696  | PLCL2     | 3'106 | 0.003 | AW994919  | BCL10     | -2'036 | 0.015 |
| BF090168  | KBTBD11   | 3'119 | 0.001 | BC012423  | SOD2      | -2'034 | 0.003 |
| BE719302  | C1orf165  | 3'136 | 0.001 | BF812924  | COX5B     | -2'020 | 0.017 |
| BE168153  | CCT2      | 3'143 | 0.003 | BC000043  | ARF4L     | -2'020 | 0.003 |
| BF820015  | FLJ11806  | 3'152 | 0.003 | BE835958  | TJP2      | -2'019 | 0.011 |
| BF910853  | NMI       | 3'185 | 0.003 | BC033071  | GRTP1     | -2'017 | 0.019 |
| BE818267  | ambiguous | 3'241 | 0.003 | AW796618  | OSR2      | -2'016 | 0.006 |
| BC011786  | LOC492304 | 3'271 | 0.003 | BE767441  | PTGS1     | -2'009 | 0.007 |
| BF817318  | GTF2IRD1  | 3'272 | 0.006 | AW370668  | CD276     | -2'008 | 0.023 |
| BF943453  | ROBO1     | 3'279 | 0.001 | BE174045  | YSG2      | -2'007 | 0.019 |

|           |           |       |       |
|-----------|-----------|-------|-------|
| AW804706  | ACSL5     | 3'292 | 0.004 |
| AF158378  | AMACR     | 3'296 | 0.003 |
| BC017064  | TTMP      | 3'372 | 0.003 |
| BQ300473  | CD207     | 3'377 | 0.003 |
| BF903122  | S100A12   | 3'423 | 0.003 |
| AW891485  | NEK11     | 3'428 | 0.001 |
| BF081837  | FADS1     | 3'524 | 0.003 |
| AW901047  | PRICKLE1  | 3'550 | 0.003 |
| BQ304273  | JRK       | 3'550 | 0.003 |
| BF769303  | CRYZL1    | 3'560 | 0.003 |
| NM_000917 | P4HA1     | 3'567 | 0.006 |
| BF989454  | C15orf15  | 3'588 | 0.003 |
| AK057803  | ANKRD11   | 3'589 | 0.003 |
| BE826039  | CLIC4     | 3'594 | 0.003 |
| BF930844  | BAZ2B     | 3'608 | 0.003 |
| AW579059  | ARHGAP17  | 3'612 | 0.003 |
| BF155684  | TIPRL     | 3'696 | 0.003 |
| BG006378  | SNRP70    | 3'714 | 0.006 |
| BE812075  | LASS2     | 3'780 | 0.003 |
| BI044030  | TPX2      | 3'798 | 0.003 |
| BF805543  | BIN1      | 3'815 | 0.001 |
| BC033089  | LCN2      | 3'815 | 0.003 |
| AW363009  | MUC13     | 3'831 | 0.001 |
| AW884049  | MAP1LC3B  | 3'853 | 0.003 |
| AW378442  | TP53INP1  | 4'071 | 0.003 |
| NM_018212 | ENAH      | 4'105 | 0.005 |
| BG987006  | ZNF395    | 4'231 | 0.003 |
| BE826174  | ALCAM     | 4'316 | 0.003 |
| BE010132  | HMOX1     | 4'355 | 0.001 |
| AW946977  | KIAA0261  | 4'400 | 0.003 |
| BC008357  | D15Wsu75e | 4'470 | 0.003 |
| NM_001057 | TACR2     | 4'482 | 0.001 |
| AW840524  | C20orf47  | 4'567 | 0.003 |
| AW875596  | STAR      | 4'643 | 0.003 |
| AW839499  | DNAPTP6   | 4'687 | 0.003 |
| BG009056  | DLK1      | 4'700 | 0.003 |
| BQ312371  | MEST      | 4'705 | 0.003 |
| BF379035  | GALNT11   | 4'874 | 0.003 |
| BE716219  | SQRDL     | 4'942 | 0.003 |
| AW801248  | ZNF83     | 5'137 | 0.003 |
| M11315    | COL4A1    | 5'238 | 0.003 |
| BI042253  | CLK1      | 5'303 | 0.003 |

|          |         |        |       |
|----------|---------|--------|-------|
| BE934282 | PPP2R2A | 5'322  | 0.003 |
| AW837156 | HSPH1   | 5'596  | 0.001 |
| BF746371 | LMAN2   | 5'798  | 0.001 |
| BE708344 | DCUN1D4 | 5'871  | 0.003 |
| BF854150 | C6orf48 | 5'920  | 0.003 |
| BE843419 | MRPL22  | 6'175  | 0.003 |
| BF803043 | GLTSCR2 | 6'315  | 0.002 |
| AW862084 | ZNF189  | 6'748  | 0.003 |
| BE762418 | RPL5    | 7'204  | 0.003 |
| BF087631 | LRP2    | 7'211  | 0.001 |
| AW852329 | PXDN    | 7'299  | 0.003 |
| BF807883 | VIL1    | 7'334  | 0.003 |
| BI003885 | COPB2   | 7'654  | 0.003 |
| BQ368170 | GPC3    | 7'791  | 0.003 |
| AW385724 | DPP4    | 9'483  | 0.003 |
| AW854063 | ANXA13  | 11'909 | 0.003 |
| AW797111 | HSPA6   | 20'794 | 0.003 |
