# Supplementary material
Source: publisher figshare collection journal article supplement (https://karger.figshare.com/articles/dataset/_/5120461)
Supplement: Supplementary file 3 [file 1]

| Table 1: Characteristics of patients |                  |         |                                      |                     |                 |
|--------------------------------------|------------------|---------|--------------------------------------|---------------------|-----------------|
| Patient                              |                  |         | Sample                               |                     |                 |
| Tumor                                | Age at diagnosis | Gender  | Predominant component in whole tumor | Isolated Component  | First Treatment |
| WT1                                  | 5                | F       | Blastema                             | Blastema            | Surgery         |
| WT2                                  | 51               | F       | Blastema                             | Blastema            | Surgery         |
| WT3                                  | 24               | F       | Blastema                             | Blastema            | Surgery         |
| WT4                                  | 24               | M       | Triphasic                            | Blastema and Stroma | Surgery         |
| WT5                                  | 24               | F       | Epithelium                           | Epithelium          | Surgery         |
| WT6                                  | 12               | F       | Stroma                               | Blastema            | Chemotherapy    |
| WT7                                  | unknown          | unknown | Epithelium                           | Epithelium          | unknown         |
| WT8                                  | 21               | F       | Stroma                               | Blastema and Stroma | Chemotherapy    |
| WT9                                  | 19               | M       | Epithelium                           | Epithelium          | Chemotherapy    |
| WT10                                 | 5                | F       | Stroma                               | Stroma              | Surgery         |
| WT11                                 | 11               | M       | Triphasic                            | Epithelium          | Chemotherapy    |

Age in months. F: female; M: male.
